# Supplementary material for: The substructure of extremely hot summers in the Northern Hemisphere
Source: Copernicus journal article supplement (doi:10.5194/wcd-2019-12), 2019-11-25
Supplement: Supplementary file [file wcd-2019-12-AC1-supplement.pdf]

1 **Replies document for reviews of:**

2 **The substructure of extremely hot summers in the Northern Hemisphere**

3

4 Matthias Röthlisberger<sup>1</sup>, Michael Sprenger<sup>1</sup>, Emmanouil Flaounas<sup>1</sup>, Urs Beyerle<sup>1</sup> and Heini  
5 Wernli<sup>1</sup>

6 <sup>1</sup>Institute for Atmospheric and Climate Science, ETH Zürich, Zürich, Switzerland

7

8

9 Corresponding author address:

10 Matthias Röthlisberger

11 Institute for Atmospheric and Climate Science,

12 ETH Zürich, Zürich, Switzerland

13 E-mail: [matthias.roethlisberger@env.ethz.ch](mailto:matthias.roethlisberger@env.ethz.ch)

## 14 **General comments to the Reviewers**

15 We would like to thank both reviewers for their thoughtful and overall encouraging reviews.  
16 The reviews were particularly useful for identifying weaknesses in the presentation of the  
17 material, but also helped to sharpen our own view of the value of our key results. Major changes  
18 that we made to the manuscript include the following: Both reviewers requested the novelties  
19 and key insights of this study to be presented more clearly and to account for these comments,  
20 we substantially re-worded Section 4. Moreover, we repeated all our analyses after removing a  
21 linear trend from all JJA T2m data at each grid point in both data sets, which meant that we  
22 also had to redraw all our figures. Note, however, that none of our original conclusions were  
23 altered by this detrending. Line numbers mentioned in in this document refer to line numbers  
24 in the revised manuscript, unless stated otherwise. Reviewer comments are included below in  
25 black font colour and our replies in blue.

### 26 27 **Reviewer 1**

28 This manuscript investigates Northern Hemisphere extreme hot summer seasons from a  
29 statistical point of view. The topic is relevant, because hot summers have societal impact and  
30 are going to become more frequent due to anthropogenic climate change. The paper focuses on  
31 the entire 3-month summer season rather than addressing individual heat waves (which have  
32 been studied before quite extensively). The method involves a novel statistical analysis based  
33 on ranking the 92 days of a summer season according to their anomaly with respect to the  
34 corresponding climatology. The results indicate that hot summers in different areas on the  
35 Northern Hemisphere may have different substructure: in some regions a summer season tends  
36 to be hot because the hottest tercile is anomalously hot, while in other regions the summer  
37 season tends to be hot because the coldest tercile is anomalously hot. In addition, it is shown  
38 that the Community Earth System Model (CESM) is able to broadly represent such regional  
39 differences. The regional differences are made plausible by studying a few cases/locations. I  
40 think these are interesting results. In addition, the paper is very well written. I have a few  
41 specific comments below which may help to produce a final version.

### 42 43 **Comments:**

44 Major:

- 45 1. My only general comment is the following. I found that the statistical method is well  
46 described and sounds very interesting, and while reading I was eagerly awaiting the  
47 discussion of possible physical causes. But then (reading that section) I was somewhat

48 disappointed. For instance, the shift in the onset of the Indian monsoon obviously  
49 explains the behavior found in the statistical analysis; actually, the explanation is so  
50 obvious that in retrospect the statistical analysis almost appears as an artifact. Let me  
51 grossly exaggerate to make my point clear: if you have a very simple phenomenon and  
52 apply a rather complex or strange analysis to it, you are likely to find a complex or  
53 strange result, but the complexity or strangeness of the result in this case would be  
54 mostly a feature of the analysis and not a feature of nature. Having said this, I still  
55 believe that the analysis is worth doing, and you do it very well.

56 We agree with the reviewer insofar as in some regions, the physical causes of extreme  
57 summers (and their substructure) are very easily understood. However, we do not  
58 believe that this jeopardizes the value of the results and novel insights presented in this  
59 study. Therefore, we understand this reviewer comment as a call for more clearly  
60 highlighting the novel insights derived from this study.

61  
62 There are four main results of this study that could not have been achieved without  
63 developing and applying our novel seasonal anomaly decomposition. First, for each  
64 season and grid point, it allows to exactly quantify how much each rank day contributes  
65 to the seasonal anomaly or, similarly, how anomalous each rank day was. The key point  
66 here is that these results are quantitative and straight forward to understand. For  
67 example, our method allows to make statements like: the hottest 30 days of the 2010  
68 summer at the grid point 35°E/58°N were each at least 4 K hotter than their respective  
69 rank day mean (i.e., their climatological value, Fig 4e). We expect such local  
70 quantitative statements to be particularly relevant for impact studies, as, e.g., excess  
71 mortality, ecosystem damages and agricultural yield losses during a particular extreme  
72 season conceivably strongly depend on the particular substructure of the extreme  
73 season.

74  
75 Second, our method allows to study the spatial variability in the extreme summer  
76 substructure and, furthermore, allows to make statements about the relevance of the  
77 coldest, middle and hottest third of extreme summers in a spatially aggregated sense.  
78 For example, even though European and US heat waves have been studied widely in  
79 the past, it simply has not been known so far that, e.g., in Nevada, the coldest third of  
80 the summer days contribute most to extreme summers, while the hottest third of summer  
81 days is most important over the UK. Furthermore, it is a novel insight from this study

82 that almost everywhere in the Northern Hemisphere, the coldest third of the summer  
83 contributes substantially ( $>25\%$ ) to extreme summer temperature anomalies. The  
84 general relevance of unusually mild summer days for extreme summers is an important  
85 result, as it illustrates that we cannot understand extreme summers solely by studying  
86 heat waves. Rather, a complete picture of what generates extreme summers must include  
87 an understanding of processes operating on longer than synoptic time scales and how  
88 they organize different types of synoptic scale-flow features to both prevent cold  
89 summer days and foster heat waves.

90  
91 Third, our study unravels that the mean extreme summer substructure (i.e., averaged  
92 over all extreme summers at a particular grid point) can be assessed qualitatively from  
93 the variance and skewness of the underlying T2m distribution. This is relevant because  
94 there is a large and robust body of literature that has studied the dynamical drivers of  
95 the shape of the T2m distribution. Thus, at least qualitatively, the arguments put forward  
96 in these studies to explain the T2m distribution shape can also be used to explain the  
97 mean extreme summer substructure.

98  
99 Fourth, we demonstrate that a state-of-the-art climate model (i.e., the CESM1 model)  
100 largely reproduces the observed extreme summer substructures. This result testifies to  
101 the model's ability to correctly reproduce the dynamical drivers of extreme summers  
102 and will be particularly relevant for subsequent studies on extreme summers (and their  
103 substructures) in a changing climate.

104  
105 All of these four points are now made even more explicit in Section 4 (Summary and  
106 concluding remarks), in particular on lines 422-436:

107  
108 “Furthermore, a key finding of this study is that the mean extreme summer substructure  
109 is consistent with the shape of the underlying local T2m distribution. The extreme  
110 summer substructure is largely determined by which of the 92 JJA rank days are most  
111 variable (i.e., the rank day variability pattern), which is qualitatively related to the  
112 skewness of the T2m distribution. Simply speaking, in regions where the coldest days  
113 of the summer are most variable (i.e., negatively skewed T2m distribution), extreme  
114 summers occur when the coldest days of the summer are unusually hot, and,  
115 analogously, for the case where hottest days vary the most (i.e., positively skewed T2m

116 distribution). This finding is relevant for two reasons. Firstly, it constrains what kind of  
117 extreme summer substructures can locally be expected, in particular in regions with  
118 strongly skewed daily temperature distributions. For example, extreme summers arising  
119 primarily from extremely hot summer days (i.e., heat waves) are unlikely to occur in  
120 regions with strongly negatively skewed temperature distributions. Secondly, some  
121 individual extreme summers such as the 2010 summer at the grid point at 35°E/58°N  
122 featured clear temperature regime shifts, with rank day anomalies far outside of what  
123 could be expected from their climatological variability (e.g., almost twice as large as  
124 the second large anomalies for the same ranks during the 2010 summer at 35°E/58°N).  
125 The general consistency between the mean extreme summer substructure and the  
126 skewness of the underlying T2m distribution illustrates that such regime shifts in the  
127 temperature variability during extreme summers are the exception rather than the  
128 norm.”

129  
130 And on lines 481-509: “A further key result of this study is that in most places, the cool  
131 summer days contribute substantially to extreme summer T2m anomalies [more than  
132 25% over 83% (86%) of the Northern Hemisphere land area in ERAI (CESM)]. In fact,  
133 Fig. 5 reveals that for ERA-Interim (CESM) in 46% (49%) of the Northern Hemisphere  
134 land area, the coldest third of the summer contributes more to the extreme summer  
135 anomaly (XA) than the hottest third. Thus, large positive seasonal temperature  
136 anomalies (i.e. extreme summers as opposed to individual heat waves), cannot be  
137 understood and explained by only considering the physical drivers of heat waves.  
138 Rather, the processes which suppress the occurrence of cold summer days must also be  
139 considered. Yet, these processes are so far virtually unexplored and thus possibly yield  
140 an untapped potential for improving our understanding of extreme summers. However,  
141 as illustrated by the example of extreme summers in the western US, the processes that  
142 suppress the occurrence of cold summer days sometimes seem rather intangible, as they  
143 do not necessarily manifest themselves in the occurrence of an unusual flow pattern, but  
144 rather in the non-occurrence of the particular flow that typically produces the coldest  
145 summer days.

146  
147 This study has illustrated that extreme summers across the Northern Hemisphere have  
148 distinct substructures, which result directly from the physical causes of the extreme  
149 summers. However, the concept of the extreme season substructure has applications

150 beyond what has been presented in this study and thus calls for subsequent studies.  
151 Firstly, the presented analyses could be extended to the Southern Hemisphere and other  
152 seasons and variables. (The application of the technique is most promising for variables  
153 that are potentially unbound and variable on both ends, i.e., not for a positive definite  
154 variable like precipitation.) Secondly, the concept of a “season substructure” can be  
155 relevant for field campaigns, as the representativeness of the campaigns’ measurements  
156 depends on how representative the time period of the campaign was (Wernli et al.,  
157 2010). Thirdly, extreme summers with distinct substructures conceivably have different  
158 societal effects and thus future research should assess whether or not and where the  
159 extreme summer substructure is affected by climate change. The results of this study  
160 suggest that the CESM is a suitable tool for this task, as it is largely able to reproduce  
161 the observed (ERA-Interim) extreme summer substructure in the current climate.  
162 However, some of the extreme summers observed within the last 40 years appear to be  
163 outside of the spectrum of 700 years of CESM. Hence, while CESM is able to reproduce  
164 the local extreme summer substructures, it may not be able to reproduce the most  
165 extreme summers that are physically possible in some regions. Clearly, this finding  
166 requires detailed and critical further investigation. Finally, changes in the extreme  
167 summer substructure with climate change must be related to changes in the physical  
168 causes of extreme summers, as a uniform warming would not affect the local rank day  
169 variability pattern. Therefore, contrasting extreme summer substructures in present and  
170 future climate simulations might also help to identify regions where the physical causes  
171 of extreme summers are altered by climate change.”

172  
173 **Minor:**

- 174 1. Line 68: Can you give here an example, too?! You could, for instance, mention Nevada  
175 (USA) and say that this will be discussed later.

176 We prefer not to give an additional example here for two reasons. First, we call these  
177 other possibilities “plausible”, as at this stage in the study it is not yet clear whether or  
178 not they at all occur. Second, we discuss distinct substructures in much detail on lines  
179 181-231 and would not like to make reference to these examples (which are “results” of  
180 this study) already in the introduction.

- 181  
182 2. Line 96: Do you really "illustrate physical causes"? I feel that you, rather, aim to  
183 "uncover the underlying physical causes for the different summer substructures".

184 We believe that we indeed “illustrate physical causes”, but the second part of the  
185 sentence, “in selected regions”, is just as important. The phrasing suggested by the  
186 reviewer appears to imply that particular extreme summer substructures have particular  
187 physical causes, regardless of where on the globe they occur. Given that similar extreme  
188 summer substructures can be found e.g., over the northern Sahel region and the high  
189 Arctic, we should have stated more clearly that of course distinct physical causes might  
190 lead to one and the same extreme summer substructure, provided they occur in different  
191 regions.

192  
193 To account for this comment, lines 474-479 now read: “Clearly, distinct physical causes  
194 might lead to similar extreme summer substructures, in particular when comparing  
195 regions that are far apart (e.g., the northern Sahel region and the high Arctic, Fig. 5).  
196 However, similar extreme summer substructures in neighboring regions conceivably  
197 also point to similar physical causes of extreme summers (e.g., the Asian Monsoon  
198 region). Therefore, the extreme summer substructure is a helpful tool for discriminating  
199 between neighboring regions with distinct physical causes of extreme summers and  
200 might also be helpful for identifying coherent regions with similar physical causes of  
201 extreme summers.”

- 202  
203 3. Beginning of section 2.3: At this point I thought your analysis implies some spatial  
204 averaging, e.g., a summer season in Switzerland. Only later it becomes clear that this  
205 analysis is done grid-point wise. It would help me if you can say this rather early in the  
206 text.

207 We have added on line 130 “Furthermore, bear in mind that all these quantities are  
208 calculated at each grid point individually.”.

- 209  
210 4. Line 134: You could add that  $D = 92$  = the number of days in the summer season.  
211 This information is already provided on line 125. We therefore prefer not repeat it on  
212 original line 134.

- 213  
214 5. Line 238: "most regions"? 46% of the NH land area is less than half of the land area, so  
215 in what sense is this "most regions"? Did I get something wrong here? The same remark  
216 applies to the summary section (line 448).

217 The original sentence read: “Overall, Fig. 5c clearly demonstrates that the coldest third  
218 of all summer days contributes a substantial fraction to  $XA^{ERA1}$  in most regions.”.  
219 Hence, “most regions” refers to “the regions where the coldest third of all summer days  
220 contributes a substantial fraction to  $XA^{ERA1}$ ”. The 46% on the other hand, refer to  
221 regions where the contribution from the coldest third exceeds the contribution from the  
222 hottest third. The question is thus what we are willing to call “a substantial fraction”.  
223 Figure 5c shows that  $XF_{cold}^{ERA1}$  is less than 25% only in very few regions, which is why  
224 we stated that almost everywhere it is “substantial”.

225

226 To clarify this point we have rephrased this sentence (now lines 250-251) to: “Overall,  
227 Fig. 5c clearly demonstrates that the coldest third of all summer days contributes a  
228 substantial fraction to  $XA^{ERA1}$  in most regions [more than 25% over 83% of the  
229 Northern Hemisphere land area in ERAI]”

230

231 6. Line 273: I wonder to what extent this "result" is more or less trivial: To the extent that  
232 a particular tercile of the distribution is much more variable than the other two, does  
233 this not imply by necessity that an anomalous season must be due to this tercile being  
234 anomalous? If this is so (i.e., more or less trivial), you should say this; if I am wrong  
235 and this is not trivial, it would help (me, but possibly other readers as well) to explain  
236 why it is not trivial. This remark applies equally to the conclusion section (line 407) and  
237 the abstract (line 26).

238 Indeed, in retrospect, this result is rather easily understood, and thus plausible. However,  
239 it is nevertheless certainly relevant, at least for two reasons. First, it is not a priori clear  
240 that the climatologically most variable tercile must contribute most to extreme seasons,  
241 as also some kind of temperature regime shifts could occur during the most extreme  
242 seasons. Such a regime shift can be observed during the 2010 summer at the grid point  
243  $35^{\circ}\text{E}/58^{\circ}\text{N}$ , during which the hottest 30 days exhibited rank day anomalies that were  
244 roughly twice as large as during the second most extreme summer (Fig. 3e) and thus  
245 clearly showed a different behaviour than in the climatology. The result referred to by  
246 the reviewer shows that such regime shifts do not generally occur during extreme  
247 summers.

248

249 Second, it is not so much the result itself but rather its implications that are non-trivial.  
250 The fact that the extreme summer substructure is consistent with the underlying T2m



251 distribution constrains the possible extreme summer substructures. For example, in a  
252 region with strongly negatively skewed temperature distribution, extreme summers are  
253 very unlikely to arise from typical “heat waves”, but rather must arise from processes  
254 that suppress cool summer days. However, those processes have hitherto not been studied  
255 extensively. We are not aware of any previous study making this point and therefore  
256 find it novel and relevant.

257  
258 We now mention the relevance of this result explicitly on lines 423-436: “Furthermore,  
259 a key finding of this study is that the mean extreme summer substructure (i.e., the  
260 average substructure of all extreme summers at a particular grid point) is consistent with  
261 the shape of the underlying local T2m distribution. The mean extreme summer  
262 substructure is largely determined by which of the 92 JJA rank days are most variable  
263 (i.e., the rank day variability pattern), which is qualitatively related to the skewness of  
264 the T2m distribution. Simply speaking, in regions where the coldest days of the summer  
265 are most variable (i.e., negatively skewed T2m distribution), extreme summers occur  
266 when the coldest days of the summer are unusually hot, and analogously for the case  
267 where hottest days vary the most (i.e., positively skewed T2m distribution). This finding  
268 is relevant for two reasons. Firstly, it constrains what kind of extreme summer  
269 substructures can locally be expected, in particular in regions with strongly skewed daily  
270 temperature distributions. For example, extreme summers arising primarily from  
271 extremely hot summer days (i.e., heat waves) are unlikely to occur in regions with  
272 strongly negatively skewed temperature distributions. Secondly, some individual  
273 extreme summers such as the 2010 summer at the grid point at 35°E/58°N featured clear  
274 temperature regime shifts, with rank day anomalies far outside of what could be  
275 expected from their climatological variability (e.g., twice as large as the second large  
276 anomalies for the same ranks during the 2010 summer at 35°E/58°N). The consistency  
277 between the mean extreme summer substructure and the skewness of the (full) T2m  
278 distribution illustrates that such regime shifts in the temperature variability during  
279 extreme summers are the exception rather than the norm.”

- 280  
281  
282 7. Line 284: "closely"— really? There is quite some resemblance, but I would not call it  
283 "close".

284 We deleted “closely”.

285  
286  
287  
288  
289  
290  
291  
292  
293  
294  
295  
296  
297  
298  
299  
300  
301  
302  
303  
304  
305  
306  
307  
308  
309  
310  
311  
312  
313  
314  
315  
316  
317  
318

8. Line 364: Is this really a "breaking" trough? In my eyes this is a large (nonlinear) trough, but not quite breaking (yet).

Following McIntyre & Palmer (1983) and Martius, Schwierz, & Sprenger (2007) we use "breaking trough" synonymously with "nonlinear trough". It is important to bear in mind that this is a composite trough. Hence, if the composite trough (composited over 100 days) already features meridionally overturning of PV contours, we do feel confident to call it a breaking trough.

9. Line 405: Can you speculate why in some areas there is no good correspondence between CESM and ERA-Interim?

The reviewer raises a very interesting question, which in our opinion might warrant a subsequent study. However, as the reviewer points out quite rightly, based on the presented results we could only speculate about why CESM and ERAI extreme summer substructures disagree in some regions. We are concerned that speculation about this point might lead to more confusion than clarity and therefore refrain from doing so.

10. Line 302: Should it not read V Fcold and V Fhot?!

Yes, indeed, many thanks for spotting this error! We have changed this according to the reviewer comment.

11. Line 588: Is "Earth's Futur." the title of the journal?

Yes, the title of the journal is "Earth's Future", which is abbreviated in the WCD citation style to "Earth's Futur.". The paper can be accessed under:

<https://agupubs.onlinelibrary.wiley.com/doi/full/10.1029/2019EF001189>

## Reviewer 2

Summary: In this paper, the authors introduce the method of calculating rank day anomalies for each summer in order to characterize the distribution of temperatures during extreme summers. The method, as I understand it, is to sort the 92 daily mean temperature values at each location and then calculate the average at each rank. Then for each summer, the deviation from this climatological mean is taken. They find that in the arctic, extreme summers occur when cold days are warmer than usual and in India, the hottest days drive the anomalously extreme

319 summers. A point that I think is particularly important that is made somewhat in passing is that  
320 the characteristics of the extreme summers are consistent with the characteristics of the  
321 underlying temperature distributions—there is no obvious regime shift or equivalent for the  
322 hottest summers. From this perspective, I think this is a useful tool to verify that we can  
323 understand extreme seasons by understanding the underlying temperature distributions.  
324 Overall, I find this study to be worthwhile, but a bit confusing. As the authors state, this is a  
325 novel method for looking at extreme summers. They do not spend much time justifying the  
326 introduction of such a method, and the advantages it has over examining the local temperature  
327 distributions themselves or over methods such as looking at compound heatwaves (Baldwin et  
328 al. 2019). Indeed, one of my main takeaway messages from this paper was that extreme  
329 summers can be relatively well described by understanding the variance and skewness of the  
330 underlying temperature distribution (more below). This method proved that particular point  
331 quite nicely. If there are other advantages or conclusions that can be drawn uniquely from these  
332 metrics, the authors should highlight them. I believe this paper will be suitable for publication  
333 after it addresses the following concerns:

334

335 **Major:**

- 336 1. As mentioned above, what is the advantage of this method over more typical  
337 examinations of temperature distributions? How does the calculation of RDA differ  
338 from quantile analysis? How does the comparison of the contributions of the top 33%  
339 and the bottom 33% differ from examining skewness? How does the spatial pattern of  
340 XA compare to the spatial pattern of temperature variance? I have included plots based  
341 on the ERA-I data I had handy (850 hPa, 1980-2014, 4xdaily), but I think the inclusion  
342 of ERA-I surface temperature variance and skewness plots is essential. The comparison  
343 with Loikith et al. 2018 is pretty impossible given the size of the panels in their Fig 4.

344

345 There are several ways in which our method differs from the standard characterizations  
346 of the T2m distribution listed by the reviewer and which make our method a valuable  
347 tool that is complementary to standard methods.

348

349 A first difference lies in the purpose of the method we developed. The novelty of this  
350 study is that it assesses how entire summer seasons become extreme from a statistical  
351 (and partly dynamical) point of view. This research question is certainly relevant as  
352 recent extreme summers had large societal impacts (going beyond the impacts of

353 individual heat waves) and which therefore call for a better understanding of extreme  
354 summer seasons overall. In the process of addressing our research question we learned  
355 that the mean extreme summer substructure at a particular grid point can be inferred  
356 qualitatively from the skewness of the underlying daily temperature distribution. As the  
357 reviewer quite rightly noticed, this is a very important result of this study which could  
358 not have been anticipated beforehand. However, for any study, the choice of method is  
359 driven by the purpose of the study and not by its final results. Therefore, the quantities  
360 and methods we work with (*RDA, XA*, etc.) are natural and meaningful choices for  
361 addressing our research question, and their development and application was imperative  
362 for arriving at the understanding of extreme summers that we now have.

363  
364 Second, our method does not only allow to analyse the mean behaviour of extreme  
365 seasons at a particular grid point (i.e., averaged over all extreme seasons at a particular  
366 grid point) but can also characterize individual extreme seasons. Figures 4b,c show two  
367 examples of distinct extreme summer substructures occurring at one particular grid  
368 point. In such regions, the ability to characterize individual extreme seasons is certainly  
369 an advantage over simply characterizing the mean extreme season. Furthermore, the  
370 degree to which different extreme summers at a particular grid point resemble each other  
371 cannot be inferred from considering skewness and variance of a particular T2m  
372 distribution, but this information is readily available after employing the method  
373 developed here. For this particular purpose, quantile analysis would certainly be a valid  
374 alternative (which we actually tested in an earlier stage of this work). However, the  
375 method developed in this study allows for an exact decomposition of the seasonal  
376 anomalies, which does not rely on any quantile function and which we therefore  
377 consider to be more elegant.

378  
379 Third, we believe that the quantitative results of our seasonal anomaly decomposition  
380 are particularly straightforward to understand. For example, Fig. 4e reveals that at  
381 35°E/58°N the hottest 30 days of the 2010 summer were each at least 4 K warmer than  
382 the climatological values of the 30 hottest days, which for some ranks is more than 2 K  
383 more than the second hottest summer. Moreover, at the grid point in India, the hottest  
384 third of the summer 2005 contributed 95% of the seasonal mean anomaly. Finally, we  
385 show that over 46% of the land mass, the coldest third of extreme summers contributes  
386 more to the extreme summer anomaly than the hottest third. We do not see how such

387 exact quantitative statements on the substructure of extreme summers could be achieved  
388 based on the analyses suggested by the reviewer. However, we strongly believe that  
389 such exact quantitative statements are valuable and convey particular characteristics of  
390 extreme summers in a very intuitive way.

391  
392 In order to account for this comment, we have substantially reworded and extended the  
393 summary and concluding remarks (Section 4, lines 403-509) and moreover included  
394 Fig. S1 which shows the skewness of the daily T2m distribution in ERAI (Fig. S1 is  
395 also included at the end of this document). Furthermore, we now clearly state whether  
396 we discuss mean extreme summer substructures (i.e., averaged over all extreme  
397 summers at a particular grid point) or the substructure of a particular summer.

- 398  
399 2. The authors need to better justify not somehow accounting for the trend in summertime  
400 temperatures in ERA-I (or better yet, they need to account for the trend). The current  
401 justification, i.e., “as we are interested in extreme summers exhibiting the largest  
402 absolute T2m anomalies and not the largest T2m anomalies relative to a longterm trend”  
403 does not make sense in the context of the later discussion. The analysis as currently  
404 presented naturally conflates factors associated with global warming with the dynamics  
405 associated with internal modes of climate variability. e.g. The point in Nevada has 2016,  
406 2017, and 2018 all included in its five most “extreme” summers. The earliest “extreme”  
407 summer there is 2007. Surely, then the signal in RDA is one of global warming. And  
408 indeed, if we compare this to the results of McKinnon et al. (2016a) Figure 4, we see a  
409 warming of the whole distribution and the largest warming in the bottom quantiles. This  
410 then seems to be an examination of the forced response rather than internal variability.  
411 Meanwhile the authors argue, quite convincingly, that the extreme summers in India are  
412 related to the timing of the monsoon onset, a signal too strong to be dominated by global  
413 warming.

414 We agree with the reviewer on this point. The intention of this study was to understand  
415 how the most extreme (i.e., often recent) summers became so extreme. However, the  
416 reviewer is right, not detrending the T2m data might obscure the causes of extreme  
417 summers arising from internal variability.

418  
419 To account for this comment, all analyses have been repeated after removing a linear  
420 trend from JJA data, separately at each grid point and in both data sets. The new Figs.

421 2, 8 and 9 have been produced with non-detrended data, as for these figures absolute  
422 values of T2m are either more intuitively understood (Figs. 2 and 8) or the absolute  
423 value of T2m is relevant (Fig. 9). However, also for these Figures, extreme seasons have  
424 been identified based on the detrended data.

425  
426 None of our conclusions are altered by this detrending. However, some of the  
427 archetypical extreme seasons that we used to illustrate archetypical extreme seasons in  
428 the original Section 3.2 no longer appear as extreme seasons. Therefore, in Figs. 3d,e  
429 and 4d,e we now show results for the grid points closest to Paris (2°E/49°N) and at  
430 35°E/58°N). Note further that for the Nevada grid point the rank day variability pattern  
431 remains almost unchanged, even though the extreme seasons are now more evenly  
432 spread throughout the ERAI period.

- 433  
434 3. “Substructure” is not really an appropriate representation of what is studied in this  
435 paper. This study is not detailing the relative timing and duration of heatwaves—indeed  
436 all temporal ordering is lost in the novel method introduced here. Substructure as I  
437 would typically understand it is considered in Fig. 1 and Fig. 8 only. This isn’t such a  
438 major point about the importance of the paper, but it will require some thought as to a  
439 more appropriate term and then significant rewriting.

440 We disagree with the reviewer here but nevertheless appreciate this comment as it points  
441 to a possible source of confusion that we wish to avoid in the revised manuscript. To  
442 our knowledge, the term “season substructure” is not (yet) a widely used term in  
443 atmospheric sciences. In particular, “season substructure” does not necessarily need to  
444 have some kind of temporal meaning. Therefore, we allow ourselves to use this term in  
445 a way that does not relate to temporal ordering but that we nevertheless do find  
446 appropriate and meaningful.

447  
448 Arguably, the term “season substructure” implies some kind of disaggregation of a  
449 season into its sub-parts. Consequently, studying the “season substructure” means  
450 studying particular aspects of these sub-parts. Admittedly, one such disaggregation  
451 could be temporal and in this case, studying the season substructure would indeed mean  
452 studying, e.g., the early, middle and late parts of the season (or any other consecutive  
453 time periods during the season, such as individual heat waves). However, equally well  
454 this disaggregation could be with regard to temperature or any other variable. In this

455 case, studying the substructure of a season means studying particular aspects of the cold,  
456 middle and warm parts of this season. This is exactly how we use this term in this study  
457 and we therefore think that it indeed is appropriate.

458  
459 However, we have realized that in Fig. 1 and on original lines 60-69 we unintentionally  
460 implied a disaggregation over time, which of course was misleading the reader. We have  
461 therefore adjusted the schematic in Fig. 1 and rewritten the original lines 60-69 (now  
462 lines 60-69) to: “Like any other summer, an extreme summer will inevitably contain  
463 cooler and hotter days, which constitute the upper and lower parts of the T2m  
464 distribution during that summer. However, it is currently not known which part of the  
465 T2m distribution is particularly anomalous during an extreme summer. Thus, extreme  
466 summers with distinct “substructures” might occur, some of which are schematically  
467 illustrated in Fig. 1. For example, a summer might be an extreme summer because the  
468 hottest days of the season are particularly anomalous, with the remainder of the summer  
469 days being only moderately warmer than or even close to climatology. Such an extreme  
470 summer substructure was observed in large parts of Europe in the summer 2015, when  
471 the anomalies of the seasonal hottest days exceeded those of the seasonal mean by  
472 almost a factor of two (Dong et al., 2016). Hence, the hottest days of the 2015 summer  
473 contributed over proportionally to the seasonal mean anomaly. However, also other  
474 substructures are plausible: a suppression of cool summer days, a uniform shift in the  
475 entire summer temperature distribution or any combination of these three options.”.

476  
477 Other points:

- 478 1. The use of “d” in the equations in combination with the term “substructure” made me  
479 mistake “d” for day instead of rank. Consider a different variable name, perhaps? Or  
480 explicitly mention that ordering is lost?

481 We have rephrased the sentence on line 134, which now reads: “...T2m value with rank  
482 d in season k (i.e., the temporal ordering of the days is lost, see Fig. 2b).”

- 483  
484 2. 144 rewrite for clarity. Perhaps just “allows assessment of”? Consider adding a specific  
485 example here.

486 An example has been added on lines 146-148: “For example, if for a particular season  
487  $k$   $SA_k = 1$  K and  $RDA_{92,k} = 3$  K (i.e., the hottest day of season  $k$  is 3 K warmer than

488 the respective rank day mean) this day contributed  $3/92 = 0.0326$  K or 3.26% to the  
489 seasonal anomaly  $SA_k$ .”

- 490  
491 3. Consider mentioning which “third” is 30 days so that this calculation is perfectly  
492 reproducible

493 Lines XY read: “The notation  $[x]$  hereby stands for  $x$  rounded to the nearest integer.  
494 For computing contributions to  $SA_k$  from the middle and hottest thirds of the summer  
495 days ( $SF_{middle,k}$  and  $SF_{hot,k}$ ), the sum in Eq. (5) runs from  $\left[\frac{D}{3}\right] + 1$  to  $\left[D\frac{2}{3}\right]$  for  
496  $SF_{middle,k}$  and from  $\left[D\frac{2}{3}\right] + 1$  to  $D$  for  $SF_{hot,k}$ .” From this statement it is clear that the  
497 coldest “third” only contains 30 days.

- 498  
499 4. 181 Normally -> normal

500 Changed as requested by the reviewer.

- 501  
502 5. Consider changing the figures so that it is easier to compare ERA-I and CESM. E.g. put  
503 Fig 3a and 4 a together.

504 We have considered this option but we find it more intuitive to present the anomalies  
505  $XA^M$  alongside with their respective decompositions and therefore chose to stick to the  
506 original figure layout for Figs. 3 and 4.

- 507  
508 6. Paragraph beginning l. 243: the quantitative spatial correlation value would be helpful  
509 here.

510 We are not entirely sure what measure of spatial correlation the reviewer has in mind  
511 exactly. We prefer to leave this passage as it was originally.

- 512  
513 7. Fig. 6: The yellow contours are really difficult to read. Consider having thin dotted lines  
514 for continents so that you could use thicker black lines in place of the yellow? Or some  
515 other change to make this more readable. Magenta might be better than yellow.

516 We have changed the contour color to green and adjusted the contour levels to make  
517 them more readable.

- 518  
519 8. l. 359 normal

520 Changed as requested.



522 9. Fig. 9: Label lines within the panel b  
523 Labels have been added in panel b.  
524

525 10. Analysis of Nevada. Consider work by McKinnon et al. (2016b), which is primarily  
526 looking at Eastern US, but their conclusions still seem relevant.  
527 The work of McKinnon et al. (2016b) is certainly most interesting, in particular if one  
528 aimed at predicting the substructure of summer with a seasonal forecasting system. For  
529 the Nevada grid point, however, we do not see how exactly the work of McKinnon et  
530 al. (2016b) relates to our analysis, since their focus is primarily on the Eastern US and  
531 on predicting hot days from a particular tropical SST pattern.  
532

533 11. 1. 381 Why ... the troughs associated with cold anomalies (black contours in 10a) did  
534 not occur...  
535 The “right phasing” seems crucial to us here and there might well have been troughs  
536 with associated cold anomalies during these extreme summers, just not over the Nevada  
537 region. Therefore, we prefer our original formulation here.  
538

539 12. 1. 388 It seems like the goal (c.f. Hoskins and Woollings 2015) is to explain the full  
540 shape of the temperature PDF, since extreme summers seem consistent with the  
541 underlying distribution. But you are correct that a combined approach is necessary for  
542 that as well. So maybe just add “... to fully reveal the physical causes of the full shape  
543 of the temperature distribution, including extreme summers” or something along those  
544 lines?  
545 The reviewer comment is correct insofar as “fully revealing the physically causes of the  
546 full temperature distribution” would also help to understand the physical causes of  
547 extreme summers. This paper, however, focusses first and foremost on extreme  
548 summers and therefore we prefer to stick to our original wording.  
549

550 13. Paragraph beginning 1. 406: This seems like perhaps the major conclusion of this work.  
551 Emphasize this more at the beginning.  
552 We now emphasize this result much more in Section 4.  
553

554 14. 1. 425 This phrasing is not appropriate. “Often” cannot be determined from these three  
555 case studies, and one of the three case studies (US) is in fact a clear case of temperature  
556 advection’s importance due to an anomalously zonal jet stream.

557 We have changed the wording to (now line 450-452) “However, three case studies  
558 illustrate that the extreme summer substructure cannot always be explained by  
559 temperature advection alone.”

560

561 15. Paragraph beginning 1. 436: This is completely consistent with the eddy advection  
562 argument of Garfinkel and Harnik 2017, Tamarin-Brodsky et al. 2019, and Linz et al.  
563 2018.

564 We agree. Reference is now made to all three studies on lines 468-469: “This result is  
565 consistent with previous work on physical causes of non-Gaussian temperature  
566 distributions (Garfinkel and Harnik, 2017; Linz et al., 2018; Tamarin-Brodsky et al.,  
567 2019), as it highlights the role of temperature advection by transient waves in generating  
568 a non-uniform rank day variability pattern, or similarly, a skewed T2m distribution.”

569

570 16. 1. 443 New paragraph

571 Changed as requested.

572

573 17. 1. 445 Not convinced of this (esp. the coherent regions aspect, since mostly this has  
574 looked at individual points) by this particular study.

575 We have rephrased this paragraph in order to be more precise about how the extreme  
576 summer substructure might help to delineate coherent regions with similar drivers of  
577 extreme summers.

578

579 Lines 474-479 now read: “Clearly, distinct physical causes might lead to similar  
580 extreme summer substructures, in particular when comparing regions that are far apart  
581 (e.g., the northern Sahel region and the high Arctic, Fig. 5). However, similar extreme  
582 summer substructures in neighboring regions conceivably also point to similar physical  
583 causes of extreme summers (e.g., the Asian Monsoon region). Therefore, the extreme  
584 summer substructure is a helpful tool for discriminating between neighboring regions  
585 with distinct physical causes of extreme summers and might also be helpful for  
586 identifying coherent regions with similar physical causes of extreme summers.”

587

588 18.1. 455 A more zonally symmetric/less wavy flow is still a pattern, so this phrasing  
589 doesn't really make sense.

590 It is true that a less wavy flow is still a flow pattern but it is not "the particular flow  
591 pattern necessary to produce cold summer days". The point here really is to say that for  
592 producing abnormally mild coldest summer days no special flow pattern is required.  
593 Rather, the particular pattern that usually generates the coldest summer days just does  
594 not occur.

595  
596 To clarify this point we have rephrased lines 488-491 to: "However, as illustrated by  
597 the example of extreme summers in the western US, the processes that suppress the  
598 occurrence of cold summer days sometimes seem rather intangible, as they do not  
599 necessarily manifest themselves in the occurrence of an unusual flow pattern, but rather  
600 in the non-occurrence of the particular flow that typically produces the coldest summer  
601 days."

602 Martius, O., Schwierz, C., & Sprenger, M. (2007). Dynamical tropopause variability and  
603 potential vorticity streamers in the Northern Hemisphere — A climatological analysis.  
604 *Adv. Atmos. Sci.*, 25(3), 367–380. <https://doi.org/10.1007/s00376-008-0367-z>  
605 McIntyre, M. E., & Palmer, T. N. (1983). Breaking planetary waves in the stratosphere. *Nature*,  
606 305(5935), 593–600. <https://doi.org/10.1038/305593a0>

607

608

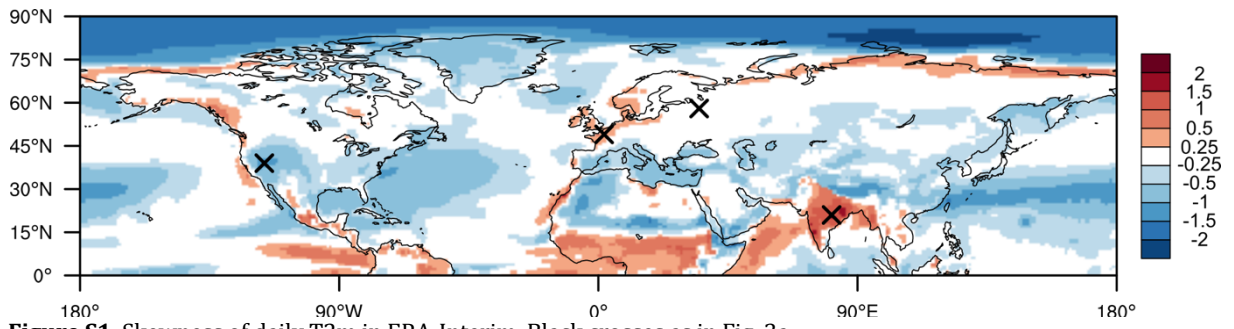

609  
610

**Figure S1.** Skewness of daily T2m in ERA-Interim. Black crosses as in Fig. 3a.

611
